# Supplementary figures and images for: Controllable photoelectron transfer in CdSe nanocrystal–carbon nanotube hybrid structures
Source: Royal Society of Chemistry journal article supplement (doi:10.1039/c2nr11577h), 2011-12-21

Electronic Supplementary Information

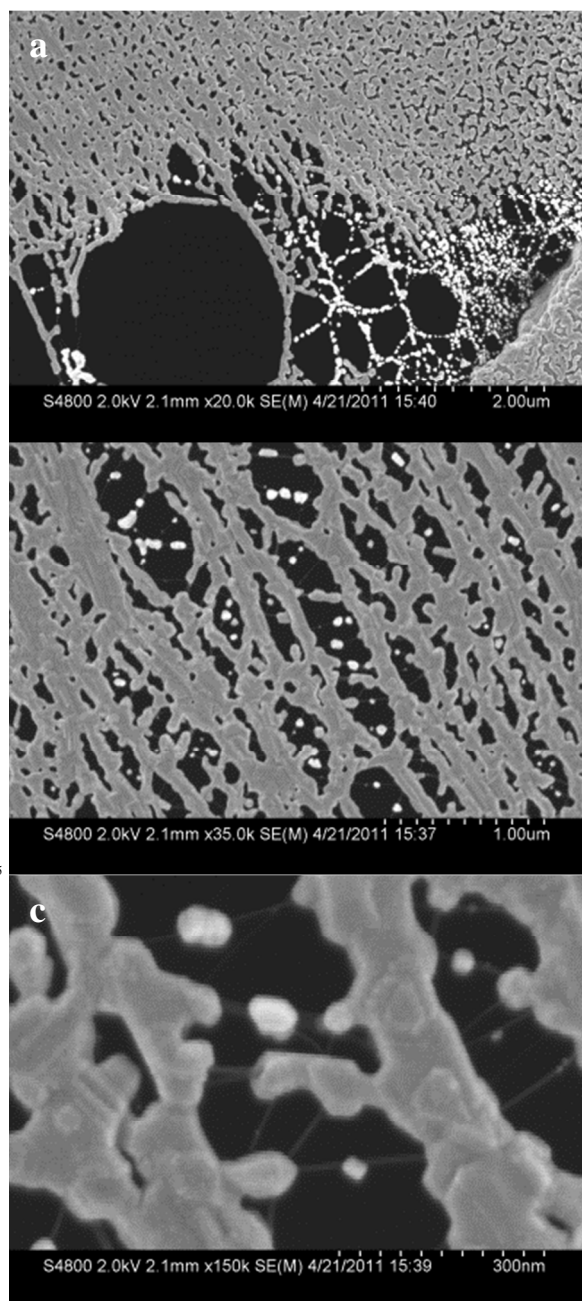

Fig S1. SEM images of *h*-CdSe-SWCNT with 5-min CVD.

Supplement: c2nr11577h.pdf [file c2nr11577h.pdf]
